# Supplementary material for: Interpreting Microbial Biosynthesis in the Genomic Age: Biological and Practical Considerations
Source: PubMed Central journal article supplement (PMC5484115; doi:10.3390/md15060165), 2017-06-06
Supplement: marinedrugs-15-00165-s001.pdf [file marinedrugs-15-00165-s001.pdf]

# Supplementary Information

| Table of Contents                                                                                                                                                                                                    | Page |
|----------------------------------------------------------------------------------------------------------------------------------------------------------------------------------------------------------------------|------|
| <b>Supplemental Methods.</b> Simulation of <i>Salinispora tropica</i> sequencing and salinilactam ( <i>slm</i> ) biosynthetic gene cluster analysis                                                                  | S1   |
| <b>Table S1.</b> Quantitative data on <i>Salinispora tropica</i> genome statistics based on simulated sequencing parameters.                                                                                         | S2   |
| <b>Figure S1.</b> Fragmentation (no. contigs) and percent recovery of the salinilactm ( <i>slm</i> ) biosynthetic gene cluster based on expanded set of simulated Illumina and PacBio sequencing parameters.         | S3   |
| <b>Figure S2.</b> (a) Nx (where x is 0 - 100% of the assembly length) and (b) cumulative length plots for assemblies using a read length of 50 bp, insert size of 275 bp and ranges of sequencing depth (1 - 1000X). | S4   |
| <b>Supplemental References.</b>                                                                                                                                                                                      | S5   |

## Supplemental Methods

### *Simulation of Salinispora tropica sequencing and salinilactam (slm) biosynthetic gene cluster analysis*

Below are the steps to simulate Illumina HiSeq 2500 and PacBio RS sequencing of the *Salinispora tropica* genome. The example shown here is for a simulation with and without PacBio sequencing using PBSIM (v1.0.3) [1] with a 30× depth of sequencing, CLR mode; and an Illumina sequencing (v2.5.1) [2] read length 125, fragment size 275 (stdev=90), and 100× depth of sequencing. The simulated sequencing datasets were assembled with SPAdes (v3.9.0) [3]

1. Simulate reads
  - Illumina only (insert size 275 bp):
    - i. `art_illumina -p -ss HS25 -l 125 -f 100 -o len125_cov100 -m 275 -s 90 -i GCA_000016425.1__ASM1642v1_genomic.fna`
  - With PacBio:
    - i. `pbsim --data-type CLR --depth 30 --model_qc model_qc_clr GCA_000016425.1__ASM1642v1_genomic.fna`
2. Assemble with SPAdes
  - Illumina only:
    - i. `spades.py -1 len125_cov100_reads1.fq.gz -2 len125_cov100_reads2.fq.gz -t 16 -m 16 -o S_tropica_len100_cov100_spades_asm`
  - With PacBio:
    - i. `spades.py -1 len125_cov100_simulated_reads1.fq.gz -2 len125_cov100_simulated_reads2.fq.gz --pacbio sd_0001.fastq -t 16 -m 16 -o Salinospora_tropica_len125_cov100_pb30X_spades_asm`
3. Align *de novo* contigs (from Illumina only run) to reference genome and calculate fragmentation based on alignment using Python script
  - `calculate_pathway_fragmentation.py -a len125_cov100_scaffolds.fasta -r GCA_000016425.1__ASM1642v1_genomic.fna -p s_tropica_cluster_coordinates.tab`

Source code for `calculate_pathway_fragmentation.py` and `s_tropica_cluster_coordinates.tab` adapted from ORF coordinates in Table 2 of Udworthy et al. [4] available at [https://github.com/ijmiller2/salinilactam\\_BGC\\_analysis](https://github.com/ijmiller2/salinilactam_BGC_analysis).

**Table S1.** Quantitative data on *Salinispora tropica* genome assembly statistics based on simulated sequencing parameters.

| parameters              | length (Mbp) | no. contigs | N50 (Kbp) | largest seq (Kbp) | Ns (bp) | %GC   |
|-------------------------|--------------|-------------|-----------|-------------------|---------|-------|
| len125_cov1             | 1.59         | 4747        | 0.3       | 1.9               | 450     | 69.43 |
| len125_cov10            | 5.14         | 195         | 117.4     | 381.5             | 265     | 69.50 |
| len125_cov100           | 5.14         | 161         | 217.8     | 441.9             | 759     | 69.50 |
| len125_cov1000          | 5.14         | 163         | 217.9     | 430.6             | 666     | 69.50 |
| len100_cov1             | 0.96         | 3038        | 0.3       | 2.0               | 1032    | 69.36 |
| len100_cov10            | 5.14         | 206         | 141.8     | 427.8             | 652     | 69.50 |
| len100_cov100           | 5.14         | 167         | 217.8     | 427.4             | 623     | 69.50 |
| len100_cov1000          | 5.14         | 166         | 217.9     | 427.6             | 720     | 69.50 |
| len50_cov1              | 0.01         | 65          | 0.2       | 1.2               | 40      | 67.49 |
| len50_cov10             | 5.12         | 370         | 75.7      | 297.4             | 4861    | 69.45 |
| len50_cov100            | 5.13         | 337         | 202.5     | 350.3             | 249     | 69.51 |
| len50_cov1000           | 5.13         | 317         | 202.5     | 350.4             | 233     | 69.51 |
| len125_cov1_frag1000    | 1.81         | 4298        | 0.4       | 4.1               | 346090  | 56.28 |
| len125_cov10_frag1000   | 5.14         | 179         | 254.7     | 427.5             | 2333    | 69.48 |
| len125_cov100_frag1000  | 5.15         | 149         | 364.5     | 596.5             | 1335    | 69.49 |
| len125_cov1000_frag1000 | 5.15         | 141         | 364.5     | 596.5             | 1252    | 69.49 |
| len125_cov100_pb10X     | 5.15         | 77          | 201.2     | 638.9             | 90      | 69.50 |
| len125_cov100_pb20X     | 5.17         | 41          | 355.3     | 921.8             | 100     | 69.49 |
| len125_cov100_pb30X     | 5.17         | 36          | 588.6     | 1110.5            | 100     | 69.49 |
| len125_cov100_pb50X     | 5.18         | 39          | 936.2     | 983.1             | 100     | 69.47 |

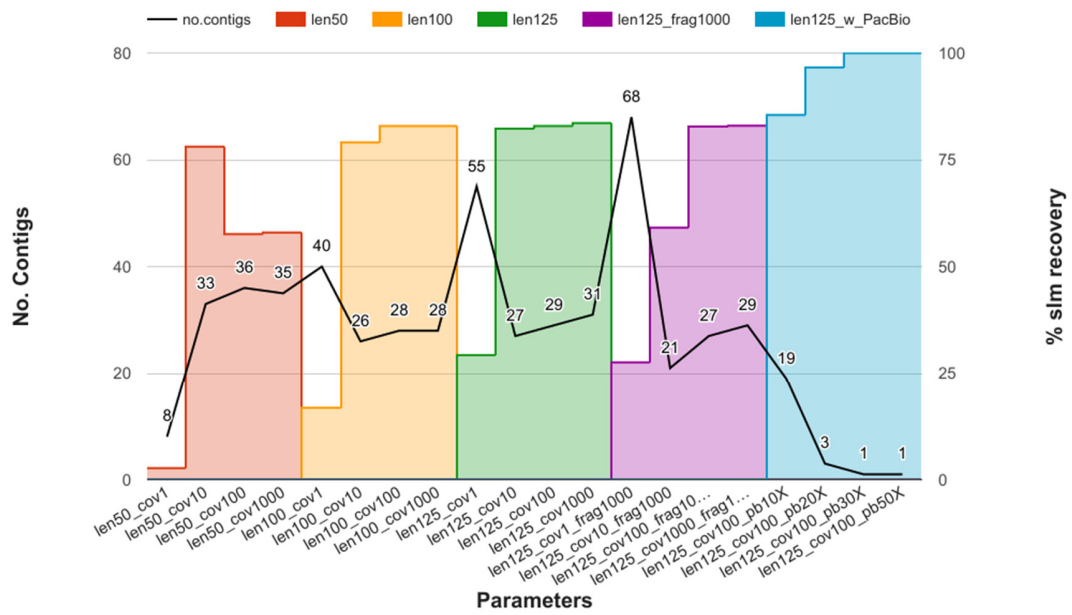

**Figure S1.** Fragmentation (no. contigs) and percent recovery of the salinilactam (*slm*) biosynthetic gene cluster based on expanded set of simulated Illumina and PacBio sequencing parameters.

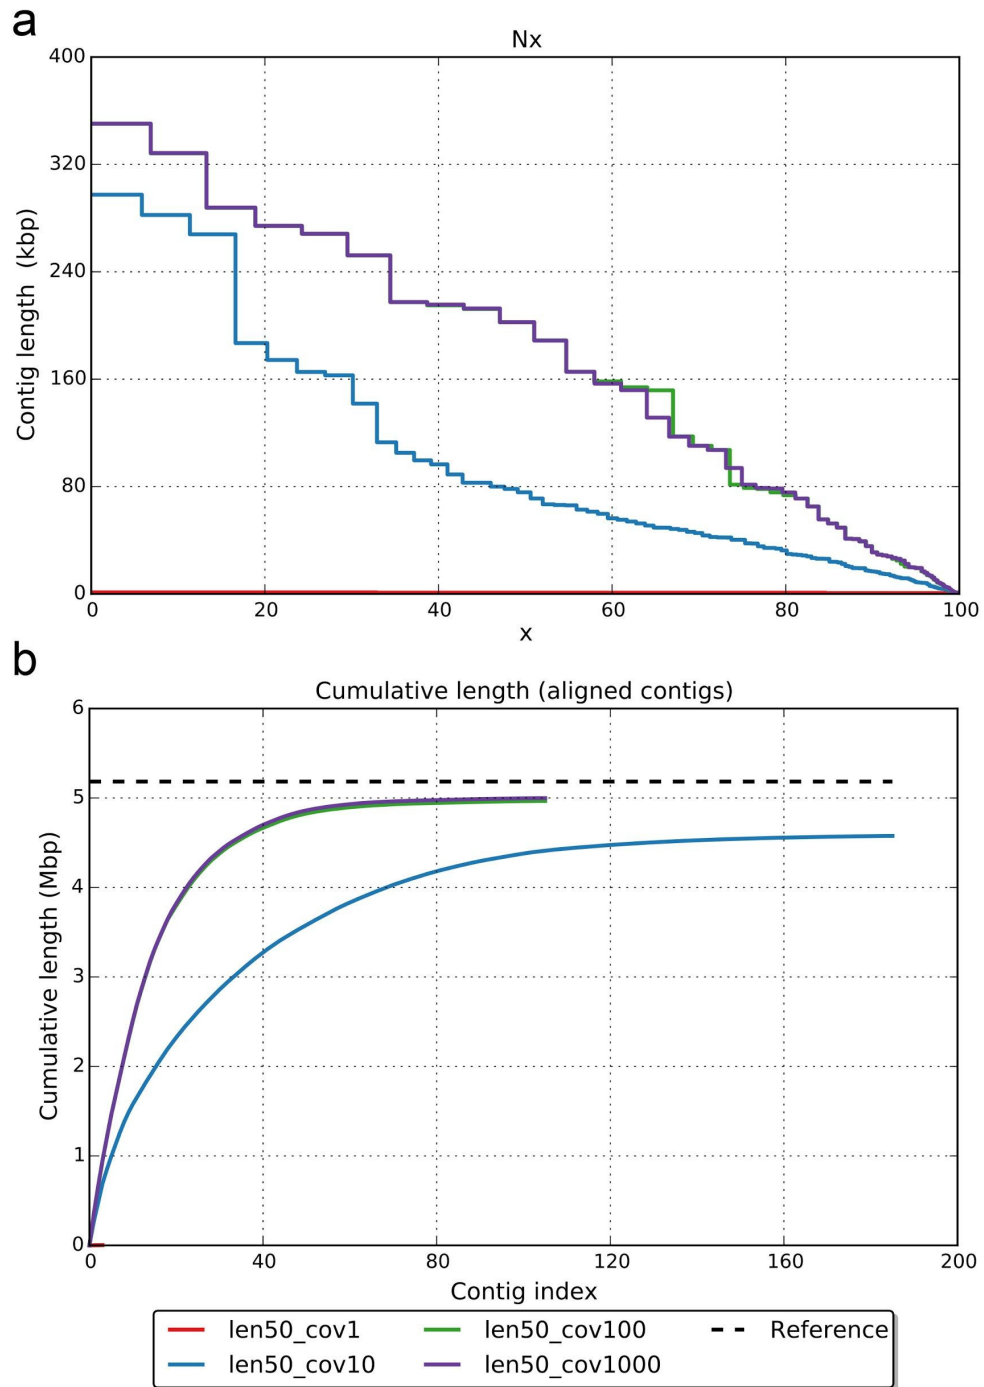

**Figure S2.** (a) Nx (where x is 0 - 100% of the assembly length) and (b) cumulative length plots for assemblies using a read length of 50 bp, insert size of 275 bp and ranges of sequencing depth (1 - 1000X) produced using QAST (v4.1) [5].

## Supplemental References

1. Ono, Y.; Asai, K.; Hamada, M. PBSIM: PacBio reads simulator—toward accurate genome assembly. *Bioinformatics* **2013**, *29*, 119–121.
2. Huang, W.; Li, L.; Myers, J. R.; Marth, G. T. ART: A next-generation sequencing read simulator. *Bioinformatics* **2012**, *28*, 593–594.
3. Bankevich, A.; Nurk, S.; Antipov, D.; Gurevich, A. A.; Dvorkin, M.; Kulikov, A. S.; Lesin, V. M.; Nikolenko, S. I.; Pham, S.; Prjibelski, A. D.; Pyshkin, A. V.; Sirotkin, A. V.; Vyahhi, N.; Tesler, G.; Alekseyev, M. A.; Pevzner, P. A. SPAdes: A new genome assembly algorithm and its applications to single-cell sequencing. *J. Comput. Biol.* **2012**, *19*, 455–477.
4. Udwary, D. W.; Zeigler, L.; Asolkar, R. N.; Singan, V.; Lapidus, A.; Fenical, W.; Jensen, P. R.; Moore, B. S. Genome sequencing reveals complex secondary metabolome in the marine actinomycete *Salinispora tropica*. *Proc. Natl. Acad. Sci. U. S. A.* **2007**, *104*, 10376–10381.
5. Gurevich, A.; Saveliev, V.; Vyahhi, N.; Tesler, G. QUASt: Quality assessment tool for genome assemblies. *Bioinformatics* **2013**, *29*, 1072–1075.

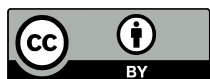

© 2017 by the authors. Submitted for possible open access publication under the terms and conditions of the Creative Commons Attribution (CC BY) license (<http://creativecommons.org/licenses/by/4.0/>).
